# Supplementary material for: Multiple Lineages of Dengue Virus Serotype 2 Cosmopolitan Genotype Caused a Local Dengue Outbreak in Hangzhou, Zhejiang Province, China, in 2017
Source: PubMed Central journal article supplement (PMC6517437; doi:10.1038/s41598-019-43560-5), 2019-05-14
Supplement: 41598_2019_43560_MOESM1_ESM.pdf [file 41598_2019_43560_MOESM1_ESM.pdf]

## Supplementary Information

Multiple Lineages of Dengue Virus Serotype 2 Cosmopolitan Genotype Caused a Local Dengue Outbreak in Hangzhou, Zhejiang Province, China, in 2017

Hua Yu 1\*, Qingxin Kong 2\*, Jing Wang 2\*, Xiaofeng Qiu 1, Yuanyuan Wen 2, Xinfen Yu 1, Muwen Liu 2, Haoqiu Wang 1, Jingcao Pan 1 §, Zhou Sun 2§

1. Microbiology Laboratory, Hangzhou Center for Disease Control and Prevention; 2. Institution of Infectious Disease Control, Hangzhou Center for Disease Control and Prevention, Hangzhou, Zhejiang Province, China, 310021.

\* These authors contributed equally. § The correspondence should be addressed to Jingcao Pan ([jingcaopan@sina.com](mailto:jingcaopan@sina.com)) or Zhou Sun ([hzcddc@qq.com](mailto:hzcddc@qq.com)).

Table S1. Accession Numbers of E gene sequences and genome sequences of dengue virus determined in this paper

| Strain              | Source      | Type   | Sequencing Method | Lineage (Clade) | Accession No. |
|---------------------|-------------|--------|-------------------|-----------------|---------------|
| D2/CN/HZ-1003/2017  | Human blood | Genome | High-Throughput   | A               | MH110564      |
| D2/CN/HZ-1312/2017  | Human blood | Genome | High-Throughput   | A               | MH110565      |
| D2/CN/HZ-1358/2017  | Human blood | Genome | High-Throughput   | A               | MH110566      |
| D2/CN/HZ-1431/2017  | Human blood | Genome | High-Throughput   | A               | MH110567      |
| D2/CN/HZ-1450/2017  | Human blood | Genome | High-Throughput   | B               | MH110568      |
| D2/CN/HZ-1469/2017  | Human blood | Genome | High-Throughput   | A               | MH110569      |
| D2/CN/HZ-1535/2017  | Human blood | Genome | High-Throughput   | A               | MH110570      |
| D2/CN/HZ-1536/2017  | Human blood | Genome | High-Throughput   | A               | MH110571      |
| D2/CN/HZ-1560/2017  | Human blood | Genome | High-Throughput   | A               | MH110572      |
| D2/CN/HZ-17/2017    | Human blood | Genome | High-Throughput   | D               | MH110573      |
| D2/CN/HZ-244/2017   | Human blood | Genome | High-Throughput   | A               | MH110574      |
| D2/CN/HZ-263/2017   | Human blood | Genome | High-Throughput   | C               | MH110575      |
| D2/CN/HZ-265/2017   | Human blood | Genome | High-Throughput   | A               | MH110576      |
| D2/CN/HZ-294/2017   | Human blood | Genome | High-Throughput   | A               | MH110577      |
| D2/CN/HZ-30/2017    | Human blood | Genome | High-Throughput   | A               | MH110578      |
| D2/CN/HZ-316/2017   | Human blood | Genome | High-Throughput   | A               | MH110579      |
| D2/CN/HZ-333/2017   | Human blood | Genome | High-Throughput   | A               | MH110580      |
| D2/CN/HZ-406-1/2017 | Human blood | Genome | High-Throughput   | A               | MH110581      |
| D2/CN/HZ-406-2/2017 | Human blood | Genome | High-Throughput   | A               | MH110582      |
| D2/CN/HZ-414/2017   | Human blood | Genome | High-Throughput   | C               | MH110583      |
| D2/CN/HZ-436/2017   | Human blood | Genome | High-Throughput   | C               | MH110584      |
| D2/CN/HZ-439/2017   | Human blood | Genome | High-Throughput   | C               | MH110585      |
| D2/CN/HZ-455/2017   | Human blood | Genome | High-Throughput   | B               | MH110586      |
| D2/CN/HZ-456/2017   | Human blood | Genome | High-Throughput   | A               | MH110587      |
| D2/CN/HZ-505/2017   | Human blood | Genome | High-Throughput   | A               | MH110588      |
| D2/CN/HZ-510/2017   | Human blood | Genome | High-Throughput   | C               | MH110589      |
| D2/CN/HZ-511/2017   | Human blood | Genome | High-Throughput   | A               | MH110590      |
| D2/CN/HZ-545/2017   | Human blood | Genome | High-Throughput   | A               | MH110591      |
| D2/CN/HZ-594/2017   | Human blood | Genome | High-Throughput   | C               | MH110592      |
| D2/CN/HZ-666/2017   | Human blood | Genome | High-Throughput   | B               | MH110593      |
| D2/CN/HZ-67/2017    | Human blood | Genome | High-Throughput   | A               | MH110594      |
| D2/CN/HZ-699/2017   | Human blood | Genome | High-Throughput   | A               | MH110595      |
| D2/CN/HZ-715/2017   | Human blood | Genome | High-Throughput   | A               | MH110596      |
| D2/CN/HZ-719/2017   | Human blood | Genome | High-Throughput   | A               | MH110597      |
| D2/CN/HZ-720/2017   | Human blood | Genome | High-Throughput   | A               | MH110598      |

|                             |             |        |                 |   |          |
|-----------------------------|-------------|--------|-----------------|---|----------|
| D2/CN/HZ-736/2017           | Human blood | Genome | High-Throughput | B | MH110599 |
| D2/CN/HZ-848/2017           | Human blood | Genome | High-Throughput | A | MH110600 |
| D2/CN/HZ-951/2017           | Human blood | Genome | High-Throughput | A | MH110601 |
| D2/CN/HZ-996/2017           | Human blood | Genome | High-Throughput | A | MH110602 |
| D2/Mosquito/CN/HZ-mos2/2017 | Mosquito    | Genome | High-Throughput | B | MH110603 |
| D2/CN/HZ-1003/2017          | Human blood | E gene | High-Throughput | A | MH110604 |
| D2/CN/HZ-1312/2017          | Human blood | E gene | High-Throughput | A | MH110605 |
| D2/CN/HZ-1358/2017          | Human blood | E gene | High-Throughput | A | MH110606 |
| D2/CN/HZ-1431/2017          | Human blood | E gene | High-Throughput | A | MH110607 |
| D2/CN/HZ-1450/2017          | Human blood | E gene | High-Throughput | B | MH110608 |
| D2/CN/HZ-1469/2017          | Human blood | E gene | High-Throughput | A | MH110609 |
| D2/CN/HZ-1535/2017          | Human blood | E gene | High-Throughput | A | MH110610 |
| D2/CN/HZ-1536/2017          | Human blood | E gene | High-Throughput | A | MH110611 |
| D2/CN/HZ-1560/2017          | Human blood | E gene | High-Throughput | A | MH110612 |
| D2/CN/HZ-17/2017            | Human blood | E gene | High-Throughput | D | MH110613 |
| D2/CN/HZ-244/2017           | Human blood | E gene | High-Throughput | A | MH110614 |
| D2/CN/HZ-263/2017           | Human blood | E gene | High-Throughput | C | MH110615 |
| D2/CN/HZ-265/2017           | Human blood | E gene | High-Throughput | A | MH110616 |
| D2/CN/HZ-294/2017           | Human blood | E gene | High-Throughput | A | MH110617 |
| D2/CN/HZ-30/2017            | Human blood | E gene | High-Throughput | A | MH110618 |
| D2/CN/HZ-316/2017           | Human blood | E gene | High-Throughput | A | MH110619 |
| D2/CN/HZ-333/2017           | Human blood | E gene | High-Throughput | A | MH110620 |
| D2/CN/HZ-406-1/2017         | Human blood | E gene | High-Throughput | A | MH110621 |
| D2/CN/HZ-406-2/2017         | Human blood | E gene | High-Throughput | A | MH110622 |
| D2/CN/HZ-414/2017           | Human blood | E gene | High-Throughput | C | MH110623 |
| D2/CN/HZ-436/2017           | Human blood | E gene | High-Throughput | C | MH110624 |
| D2/CN/HZ-439/2017           | Human blood | E gene | High-Throughput | C | MH110625 |
| D2/CN/HZ-455/2017           | Human blood | E gene | High-Throughput | B | MH110626 |
| D2/CN/HZ-456/2017           | Human blood | E gene | High-Throughput | A | MH110627 |
| D2/CN/HZ-505/2017           | Human blood | E gene | High-Throughput | A | MH110628 |
| D2/CN/HZ-510/2017           | Human blood | E gene | High-Throughput | C | MH110629 |
| D2/CN/HZ-511/2017           | Human blood | E gene | High-Throughput | A | MH110630 |
| D2/CN/HZ-545/2017           | Human blood | E gene | High-Throughput | A | MH110631 |
| D2/CN/HZ-594/2017           | Human blood | E gene | High-Throughput | C | MH110632 |
| D2/CN/HZ-666/2017           | Human blood | E gene | High-Throughput | B | MH110633 |
| D2/CN/HZ-67/2017            | Human blood | E gene | High-Throughput | A | MH110634 |
| D2/CN/HZ-699/2017           | Human blood | E gene | High-Throughput | A | MH110635 |
| D2/CN/HZ-715/2017           | Human blood | E gene | High-Throughput | A | MH110636 |
| D2/CN/HZ-719/2017           | Human blood | E gene | High-Throughput | A | MH110637 |
| D2/CN/HZ-720/2017           | Human blood | E gene | High-Throughput | A | MH110638 |
| D2/CN/HZ-736/2017           | Human blood | E gene | High-Throughput | B | MH110639 |

|                             |             |        |                 |   |          |
|-----------------------------|-------------|--------|-----------------|---|----------|
| D2/CN/HZ-848/2017           | Human blood | E gene | High-Throughput | A | MH110640 |
| D2/CN/HZ-951/2017           | Human blood | E gene | High-Throughput | A | MH110641 |
| D2/CN/HZ-996/2017           | Human blood | E gene | High-Throughput | A | MH110642 |
| D2/Mosquito/CN/HZ-mos2/2017 | Mosquito    | E gene | High-Throughput | B | MH110643 |
| D2/CN/HZ-100/2017           | Human blood | E gene | Sanger          | A | MH110644 |
| D2/CN/HZ-102/2017           | Human blood | E gene | Sanger          | A | MH110645 |
| D2/CN/HZ-103/2017           | Human blood | E gene | Sanger          | A | MH110646 |
| D2/CN/HZ-104/2017           | Human blood | E gene | Sanger          | A | MH110647 |
| D2/CN/HZ-105/2017           | Human blood | E gene | Sanger          | A | MH110648 |
| D2/CN/HZ-106/2017           | Human blood | E gene | Sanger          | A | MH110649 |
| D2/CN/HZ-107/2017           | Human blood | E gene | Sanger          | A | MH110650 |
| D2/CN/HZ-108/2017           | Human blood | E gene | Sanger          | A | MH110651 |
| D2/CN/HZ-109/2017           | Human blood | E gene | Sanger          | A | MH110652 |
| D2/CN/HZ-110/2017           | Human blood | E gene | Sanger          | A | MH110653 |
| D2/CN/HZ-111/2017           | Human blood | E gene | Sanger          | A | MH110654 |
| D2/CN/HZ-113/2017           | Human blood | E gene | Sanger          | A | MH110655 |
| D2/CN/HZ-115/2017           | Human blood | E gene | Sanger          | A | MH110656 |
| D2/CN/HZ-1216/2017          | Human blood | E gene | Sanger          | A | MH110657 |
| D2/CN/HZ-126/2017           | Human blood | E gene | Sanger          | A | MH110658 |
| D2/CN/HZ-130/2017           | Human blood | E gene | Sanger          | A | MH110659 |
| D2/CN/HZ-131/2017           | Human blood | E gene | Sanger          | A | MH110660 |
| D2/CN/HZ-133/2017           | Human blood | E gene | Sanger          | A | MH110661 |
| D2/CN/HZ-134/2017           | Human blood | E gene | Sanger          | A | MH110662 |
| D2/CN/HZ-135/2017           | Human blood | E gene | Sanger          | A | MH110663 |
| D2/CN/HZ-140/2017           | Human blood | E gene | Sanger          | A | MH110664 |
| D2/CN/HZ-141/2017           | Human blood | E gene | Sanger          | A | MH110665 |
| D2/CN/HZ-146/2017           | Human blood | E gene | Sanger          | A | MH110666 |
| D2/CN/HZ-147/2017           | Human blood | E gene | Sanger          | A | MH110667 |
| D2/CN/HZ-148/2017           | Human blood | E gene | Sanger          | A | MH110668 |
| D2/CN/HZ-149/2017           | Human blood | E gene | Sanger          | A | MH110669 |
| D2/CN/HZ-151/2017           | Human blood | E gene | Sanger          | A | MH110670 |
| D2/CN/HZ-152/2017           | Human blood | E gene | Sanger          | C | MH110671 |
| D2/CN/HZ-153/2017           | Human blood | E gene | Sanger          | A | MH110672 |
| D2/CN/HZ-17/2017            | Human blood | E gene | Sanger          | D | MH110673 |
| D2/CN/HZ-180/2017           | Human blood | E gene | Sanger          | B | MH110674 |
| D2/CN/HZ-182/2017           | Human blood | E gene | Sanger          | B | MH110675 |
| D2/CN/HZ-183/2017           | Human blood | E gene | Sanger          | B | MH110676 |
| D2/CN/HZ-211/2017           | Human blood | E gene | Sanger          | A | MH110677 |
| D2/CN/HZ-212/2017           | Human blood | E gene | Sanger          | B | MH110678 |
| D2/CN/HZ-213/2017           | Human blood | E gene | Sanger          | A | MH110679 |
| D2/CN/HZ-243/2017           | Human blood | E gene | Sanger          | A | MH110680 |

|                   |             |        |        |   |          |
|-------------------|-------------|--------|--------|---|----------|
| D2/CN/HZ-265/2017 | Human blood | E gene | Sanger | A | MH110681 |
| D2/CN/HZ-30/2017  | Human blood | E gene | Sanger | A | MH110682 |
| D2/CN/HZ-33/2017  | Human blood | E gene | Sanger | A | MH110683 |
| D2/CN/HZ-403/2017 | Human blood | E gene | Sanger | B | MH110684 |
| D2/CN/HZ-463/2017 | Human blood | E gene | Sanger | B | MH110685 |
| D2/CN/HZ-48/2017  | Human blood | E gene | Sanger | A | MH110686 |
| D2/CN/HZ-492/2017 | Human blood | E gene | Sanger | A | MH110687 |
| D2/CN/HZ-49/2017  | Human blood | E gene | Sanger | A | MH110688 |
| D2/CN/HZ-53/2017  | Human blood | E gene | Sanger | A | MH110689 |
| D2/CN/HZ-543/2017 | Human blood | E gene | Sanger | A | MH110690 |
| D2/CN/HZ-547/2017 | Human blood | E gene | Sanger | B | MH110691 |
| D2/CN/HZ-54/2017  | Human blood | E gene | Sanger | A | MH110692 |
| D2/CN/HZ-552/2017 | Human blood | E gene | Sanger | A | MH110693 |
| D2/CN/HZ-555/2017 | Human blood | E gene | Sanger | A | MH110694 |
| D2/CN/HZ-556/2017 | Human blood | E gene | Sanger | A | MH110695 |
| D2/CN/HZ-557/2017 | Human blood | E gene | Sanger | A | MH110696 |
| D2/CN/HZ-55/2017  | Human blood | E gene | Sanger | A | MH110697 |
| D2/CN/HZ-56/2017  | Human blood | E gene | Sanger | A | MH110698 |
| D2/CN/HZ-580/2017 | Human blood | E gene | Sanger | A | MH110699 |
| D2/CN/HZ-598/2017 | Human blood | E gene | Sanger | B | MH110700 |
| D2/CN/HZ-60/2017  | Human blood | E gene | Sanger | A | MH110701 |
| D2/CN/HZ-619/2017 | Human blood | E gene | Sanger | B | MH110702 |
| D2/CN/HZ-621/2017 | Human blood | E gene | Sanger | B | MH110703 |
| D2/CN/HZ-62/2017  | Human blood | E gene | Sanger | A | MH110704 |
| D2/CN/HZ-671/2017 | Human blood | E gene | Sanger | A | MH110705 |
| D2/CN/HZ-672/2017 | Human blood | E gene | Sanger | A | MH110706 |
| D2/CN/HZ-678/2017 | Human blood | E gene | Sanger | A | MH110707 |
| D2/CN/HZ-67/2017  | Human blood | E gene | Sanger | A | MH110708 |
| D2/CN/HZ-684/2017 | Human blood | E gene | Sanger | A | MH110709 |
| D2/CN/HZ-68/2017  | Human blood | E gene | Sanger | A | MH110710 |
| D2/CN/HZ-695/2017 | Human blood | E gene | Sanger | B | MH110711 |
| D2/CN/HZ-69/2017  | Human blood | E gene | Sanger | A | MH110712 |
| D2/CN/HZ-70/2017  | Human blood | E gene | Sanger | A | MH110713 |
| D2/CN/HZ-718/2017 | Human blood | E gene | Sanger | A | MH110714 |
| D2/CN/HZ-71/2017  | Human blood | E gene | Sanger | A | MH110715 |
| D2/CN/HZ-72/2017  | Human blood | E gene | Sanger | A | MH110716 |
| D2/CN/HZ-737/2017 | Human blood | E gene | Sanger | B | MH110717 |
| D2/CN/HZ-73/2017  | Human blood | E gene | Sanger | A | MH110718 |
| D2/CN/HZ-74/2017  | Human blood | E gene | Sanger | A | MH110719 |
| D2/CN/HZ-75/2017  | Human blood | E gene | Sanger | A | MH110720 |
| D2/CN/HZ-761/2017 | Human blood | E gene | Sanger | B | MH110721 |

|                   |             |        |        |   |          |
|-------------------|-------------|--------|--------|---|----------|
| D2/CN/HZ-76/2017  | Human blood | E gene | Sanger | A | MH110722 |
| D2/CN/HZ-774/2017 | Human blood | E gene | Sanger | B | MH110723 |
| D2/CN/HZ-77/2017  | Human blood | E gene | Sanger | A | MH110724 |
| D2/CN/HZ-78/2017  | Human blood | E gene | Sanger | A | MH110725 |
| D2/CN/HZ-79/2017  | Human blood | E gene | Sanger | A | MH110726 |
| D2/CN/HZ-81/2017  | Human blood | E gene | Sanger | A | MH110727 |
| D2/CN/HZ-860/2017 | Human blood | E gene | Sanger | C | MH110728 |
| D2/CN/HZ-89/2017  | Human blood | E gene | Sanger | A | MH110729 |
| D2/CN/HZ-91/2017  | Human blood | E gene | Sanger | B | MH110730 |
| D2/CN/HZ-92/2017  | Human blood | E gene | Sanger | B | MH110731 |
| D2/CN/HZ-97/2017  | Human blood | E gene | Sanger | A | MH110732 |
| D2/CN/HZ-98/2017  | Human blood | E gene | Sanger | B | MH110733 |
| D2/CN/HZ-552/2017 | Human blood | E gene | Sanger | A | MH110734 |

---

Table S2. Key amino acid mutations known to be associated with DENV virulence and viral replication in the genomes of the 2017 Hangzhou DENV-2 strains.

| Strains  | Clade | Protein position* |    |     |     |     |     |     |     |     |     |     |     |     |    |      |    |     |     |     |     |     |
|----------|-------|-------------------|----|-----|-----|-----|-----|-----|-----|-----|-----|-----|-----|-----|----|------|----|-----|-----|-----|-----|-----|
|          |       | E                 |    |     |     |     |     |     |     |     |     |     |     | NS1 |    | NS4B |    | NS3 | NS5 |     |     |     |
|          |       | 67                | 71 | 104 | 124 | 126 | 128 | 135 | 390 | 398 | 405 | 429 | 436 | 492 | 53 | 279  | 52 | 245 | 250 | 200 | 290 | 401 |
| DF-17    | D     | N                 | A  | G   | N   | E   | K   | L   | S   | I   | T   | F   | L   | M   | G  | F    | L  | N   | E   | K   | T   | R   |
| DF-30    | A     | -                 | -  | -   | -   | -   | -   | -   | -   | -   | -   | -   | -   | -   | -  | -    | -  | -   | -   | -   | -   | -   |
| DF-67    |       | -                 | -  | -   | -   | -   | -   | -   | -   | -   | -   | -   | -   | -   | -  | -    | -  | -   | -   | -   | -   | -   |
| DF-244   |       | -                 | -  | -   | -   | -   | -   | -   | -   | -   | -   | -   | -   | -   | -  | -    | -  | -   | -   | -   | -   | -   |
| DF-265   |       | -                 | -  | -   | -   | -   | -   | -   | -   | -   | -   | -   | -   | -   | -  | -    | -  | -   | -   | -   | -   | -   |
| DF-316   |       | -                 | -  | -   | -   | -   | -   | -   | -   | -   | -   | -   | -   | -   | -  | -    | -  | -   | -   | -   | -   | -   |
| DF-333   |       | -                 | -  | -   | -   | -   | -   | -   | -   | -   | -   | -   | -   | -   | -  | -    | -  | -   | -   | -   | -   | -   |
| DF-406-1 |       | -                 | -  | -   | -   | -   | -   | -   | -   | -   | -   | -   | -   | -   | -  | -    | -  | -   | -   | -   | -   | -   |
| DF-406-2 |       | -                 | -  | -   | -   | -   | -   | -   | -   | -   | -   | -   | -   | -   | -  | -    | -  | -   | -   | -   | -   | -   |
| DF-456   |       | -                 | -  | -   | -   | -   | -   | -   | -   | -   | -   | -   | -   | -   | -  | -    | -  | -   | -   | -   | -   | -   |
| DF-505   |       | -                 | -  | -   | -   | -   | -   | -   | -   | -   | -   | -   | -   | -   | -  | -    | -  | -   | -   | -   | -   | -   |
| DF-511   |       | -                 | -  | -   | -   | -   | -   | -   | -   | -   | -   | -   | -   | -   | -  | -    | -  | -   | -   | -   | -   | -   |
| DF-545   |       | -                 | -  | -   | -   | -   | -   | -   | -   | -   | -   | -   | -   | -   | -  | -    | -  | -   | -   | -   | -   | -   |
| DF-699   |       | -                 | -  | -   | -   | -   | -   | -   | -   | -   | -   | -   | -   | -   | -  | -    | -  | -   | -   | -   | -   | -   |
| DF-715   |       | -                 | -  | -   | -   | -   | -   | -   | -   | -   | -   | -   | -   | -   | -  | -    | -  | -   | -   | -   | -   | -   |
| DF-719   |       | -                 | -  | -   | -   | -   | -   | -   | -   | -   | -   | -   | -   | -   | -  | -    | -  | -   | -   | -   | -   | -   |
| DF-720   |       | -                 | -  | -   | -   | -   | -   | -   | -   | -   | -   | -   | -   | -   | -  | -    | -  | -   | -   | -   | -   | -   |
| DF-848   |       | -                 | -  | -   | -   | -   | -   | -   | -   | -   | -   | -   | -   | -   | -  | -    | -  | -   | -   | -   | -   | -   |
| DF-951   | -     | -                 | -  | -   | -   | -   | -   | -   | -   | -   | -   | -   | -   | -   | -  | -    | -  | -   | -   | -   | -   |     |
| DF-996   | -     | -                 | -  | -   | -   | -   | -   | -   | -   | -   | -   | -   | -   | -   | -  | -    | -  | -   | -   | -   | -   |     |

|         |   |                      |     |     |     |     |     |     |     |     |     |     |     |     |     |      |      |      |      |      |      |      |
|---------|---|----------------------|-----|-----|-----|-----|-----|-----|-----|-----|-----|-----|-----|-----|-----|------|------|------|------|------|------|------|
| DF-1312 |   | -                    | -   | -   | -   | -   | -   | -   | -   | -   | -   | -   | -   | -   | -   | -    | -    | -    | -    | -    | -    |      |
| DF-1358 |   | -                    | -   | -   | -   | -   | -   | -   | -   | -   | -   | -   | -   | -   | -   | -    | -    | -    | -    | -    | -    |      |
| DF-1431 |   | -                    | -   | -   | -   | -   | -   | -   | -   | -   | -   | -   | -   | -   | -   | -    | -    | -    | -    | -    | -    |      |
| DF-1469 |   | -                    | -   | -   | -   | -   | -   | -   | -   | -   | -   | -   | -   | -   | -   | -    | -    | -    | -    | -    | -    |      |
| DF-1535 |   | -                    | -   | -   | -   | -   | -   | -   | -   | -   | -   | -   | -   | -   | -   | -    | -    | -    | -    | -    | -    |      |
| DF-1536 |   | -                    | -   | -   | -   | -   | -   | -   | -   | -   | -   | -   | -   | -   | -   | -    | -    | -    | -    | -    | -    |      |
| DF-1003 |   | -                    | -   | -   | -   | -   | -   | -   | -   | -   | -   | -   | -   | -   | -   | -    | -    | -    | -    | -    | -    |      |
| DF-1560 |   | -                    | -   | -   | -   | -   | -   | -   | -   | -   | -   | -   | -   | -   | -   | -    | -    | -    | -    | -    | -    |      |
| Mos-2   | B | -                    | -   | -   | -   | -   | -   | -   | -   | -   | -   | -   | -   | -   | -   | -    | -    | -    | -    | -    | -    |      |
| DF-455  |   | -                    | -   | -   | -   | -   | -   | -   | -   | -   | -   | -   | -   | -   | -   | -    | -    | -    | -    | -    | -    |      |
| DF-666  |   | -                    | -   | -   | -   | -   | -   | -   | -   | -   | -   | -   | -   | -   | -   | -    | -    | -    | -    | -    | -    |      |
| DF-736  |   | -                    | -   | -   | -   | -   | -   | -   | -   | -   | -   | -   | -   | -   | -   | -    | -    | -    | -    | -    | -    |      |
| DF-1450 |   | -                    | -   | -   | -   | -   | -   | -   | -   | -   | -   | -   | -   | -   | -   | -    | -    | -    | -    | -    | -    |      |
| DF-263  | C | -                    | -   | -   | -   | -   | -   | -   | -   | -   | -   | -   | -   | -   | -   | -    | -    | -    | -    | -    | -    |      |
| DF-414  |   | -                    | -   | -   | -   | -   | -   | -   | -   | -   | -   | -   | -   | -   | -   | -    | -    | -    | -    | -    | -    |      |
| DF-436  |   | -                    | -   | -   | -   | -   | -   | -   | -   | -   | -   | -   | -   | -   | -   | -    | -    | -    | -    | -    | -    |      |
| DF-439  |   | -                    | -   | -   | -   | -   | -   | -   | -   | -   | -   | -   | -   | -   | -   | -    | -    | -    | -    | -    | -    |      |
| DF-510  |   | -                    | -   | -   | -   | -   | -   | -   | -   | -   | -   | -   | -   | -   | -   | -    | -    | -    | -    | -    | -    |      |
| DF-594  |   | -                    | -   | -   | -   | -   | -   | -   | -   | -   | -   | -   | -   | -   | -   | -    | -    | -    | -    | -    | -    |      |
|         |   | 347                  | 351 | 384 | 404 | 406 | 408 | 415 | 670 | 678 | 685 | 709 | 716 | 772 | 828 | 1054 | 2295 | 2488 | 1725 | 2691 | 2781 | 2892 |
|         |   | Polyprotein position |     |     |     |     |     |     |     |     |     |     |     |     |     |      |      |      |      |      |      |      |

\* The biological functions of these amino acid mutants referred to the following article: Zhao H, Zhao L, Jiang T, et al. Isolation and characterization of dengue virus serotype 2 from the large dengue outbreak in Guangdong, China in 2014. *Sci China Life Sci.* 2014. 57(12): 1149-55.



Table S3. Primers used in this research

| Reaction               | Primer name | Sequence(5'-3')            | Reference |
|------------------------|-------------|----------------------------|-----------|
| <i>E</i> Amplification | D2F         | TTGAGACATCCAGGCTTCACC      | 1         |
| <i>E</i> Amplification | D2R         | CCACTATCGGCCTGCACCAT       |           |
| Reversering            | D2-RE       | AGAACCTGTTGATTCAACAGCACCAT |           |
| Genome Amplification   | G1-F        | AGTTGTTAGTCTACGTGGACCGACA  |           |
| Genome Amplification   | G1-R        | AGCACCATCTCATTGAAGTCGAGG   |           |
| Genome Amplification   | G2-F        | CAAACACTCCATGGTAGACAGAGG   |           |
| Genome Amplification   | G2-R        | TCCCRCTGCCACATTTTCARTTCTTT |           |
| Genome Amplification   | G3-F        | ACGCSAAGAAAACAGGATGTYGTTGT |           |
| Genome Amplification   | G3-R        | TCCTGCTGTTTGTGTATGGTAGCC   |           |
| Genome Amplification   | G4-F        | CACATGGAAGATGGAGAAAGCCTC   |           |
| Genome Amplification   | G4-R        | GCCGTRATTGGTATYGATACWGGAA  |           |
| Genome Amplification   | G5-F        | ATGGMGTGACTTAYCTTGCCCTA    | 2         |
| Genome Amplification   | G5-R        | CTTCTCTAACTATGGCTGGAAGG    |           |
| Genome Amplification   | G6-F        | TGGTGTGTCACAAGGAGTGGAG     |           |
| Genome Amplification   | G6-R        | TACGCCYTTCCRCCTGCYTCAG     |           |
| Genome Amplification   | G7-F        | GCAGACAGAARGTGGTGTTTTGATG  |           |
| Genome Amplification   | G7-R        | CATTAATACTTGAGTCACGCAGAGG  |           |
| Genome Amplification   | G8-F        | TTCAAGCAAAAGCAACCAGAGAAGC  |           |
| Genome Amplification   | G8-R        | CATGGTAWGCCAYGTTTGTATGG    |           |
| Genome Amplification   | G9-F        | CAGGAAGTGGATAGAACCYTRGCA   |           |
| Genome Amplification   | G9-R        | CATTACTGTGCCCTTGGTGTGG     |           |
| Genome Amplification   | G10-F       | CTGGTTGACAGGGAAAGAAATCTCC  |           |
| Genome Amplification   | G10-R       | AGAACCTGTTGATTCAACAGCACCAT |           |

## Reference

1. Wang J, Chen H, Huang M, et al. Epidemiological and etiological investigation of dengue fever in the Fujian province of China during 2004-2014. *Sci China Life Sci.* 2017. 60(1): 72-80.
2. Cruz CD, Torre A, Troncos G, Lambrechts L, Leguia M. Targeted full-genome amplification and sequencing of dengue virus types 1-4 from South America. *J Virol Methods.* 2016. 235: 158-67.

Table S5. Information of DENV-2 genome reference sequences used in Figure 5

| Strain                                    | Accession | Genome Length | Year       | Source       | Country      |
|-------------------------------------------|-----------|---------------|------------|--------------|--------------|
| 01-St-206                                 | KF744397  | 10176         | 2001       | Homo sapiens | Philippines  |
| 05-Sa-018                                 | KF744398  | 10176         | 2005       | Homo sapiens | Philippines  |
| 1018-DF-12/03/2001                        | DQ645543  | 10671         | 12/03/2001 | -N/A-        | Taiwan       |
| 1024-DHF-12/07/2001                       | DQ645544  | 10671         | 12/07/2001 | -N/A-        | Taiwan       |
| 1183-DF-06/17/2002                        | DQ645545  | 10616         | 06/17/2002 | -N/A-        | Taiwan       |
| 1222-DF-06/24/2002                        | DQ645546  | 10671         | 06/24/2002 | -N/A-        | Taiwan       |
| 1349                                      | EU056810  | 10723         | 1983       | Homo sapiens | Burkina Faso |
| 1392                                      | JX475906  | 10670         | 2009       | Homo sapiens | India        |
| 1421-DF-07/16/2002                        | DQ645547  | 10671         | 07/16/2002 | -N/A-        | Taiwan       |
| 1464-DHF-07/20/2002                       | DQ645548  | 10644         | 07/20/2002 | -N/A-        | Taiwan       |
| 1945-DHF-08/18/2002                       | DQ645549  | 10671         | 08/18/2002 | -N/A-        | Taiwan       |
| 1949-DF-08/19/2002                        | DQ645550  | 10671         | 08/19/2002 | -N/A-        | Taiwan       |
| 2015-CZ-17                                | KX621247  | 10681         | 2015       | Homo sapiens | China        |
| 2015-CZ-23                                | KX621248  | 10681         | 2015       | Homo sapiens | China        |
| 2015-CZ-5                                 | KX621245  | 10681         | 2015       | Homo sapiens | China        |
| 2015-CZ-7                                 | KX621246  | 10681         | 2015       | Homo sapiens | China        |
| 2016_Singapore_NUH_MDC_DENV<br>-2_variant | KU948303  | 10707         | 02/23/2016 | Homo sapiens | Singapore    |
| 2191-DF-09/12/2002                        | DQ645551  | 10671         | 09/12/2002 | -N/A-        | Taiwan       |
| 2208-DHF-09/13/2002                       | DQ645552  | 10671         | 09/13/2002 | -N/A-        | Taiwan       |
| 2559-DHF-10/23/2002                       | DQ645553  | 10671         | 10/23/2002 | -N/A-        | Taiwan       |
| 2587-DF-10/26/2002                        | DQ645554  | 10616         | 10/26/2002 | -N/A-        | Taiwan       |
| 2659-DHF-11/01/2002                       | DQ645555  | 10616         | 11/01/2002 | -N/A-        | Taiwan       |
| 2784-DF-11/18/2002                        | DQ645556  | 10671         | 11/18/2002 | -N/A-        | Taiwan       |
| 7754691/BF/2016                           | KY627763  | 10675         | 11/21/2016 | Homo sapiens | Burkina Faso |
| 7869191/BF/2016                           | KY627762  | 10675         | 11/05/2016 | Homo sapiens | Burkina Faso |
| 904-DHF-10/31/2001                        | DQ645540  | 10671         | 10/31/2001 | -N/A-        | Taiwan       |
| 915-DF-11/03/2001                         | DQ645541  | 10616         | 11/03/2001 | -N/A-        | Taiwan       |
| 950-DF-11/12/2001                         | DQ645542  | 10616         | 11/12/2001 | -N/A-        | Taiwan       |
| 98900663-DHF-DV-2                         | AB189122  | 10723         | -N/A-      | Homo sapiens | Indonesia    |
| 98900665-DF-DV-2                          | AB189123  | 10723         | -N/A-      | Homo sapiens | Indonesia    |
| 98900666-DSS-DV-2                         | AB189124  | 10723         | -N/A-      | Homo sapiens | Indonesia    |
| BA05i                                     | AY858035  | 10723         | -N/A-      | Homo sapiens | Indonesia    |
| D2/Hu/NIID01/2016                         | LC121816  | 10685         | 01/2016    | Homo sapiens | -N/A-        |
| D2/Hu/OPD030NIID/2005                     | LC111438  | 10678         | -N/A-      | Homo sapiens | East Timor   |
| D2/Pakistan/2011-23/2011                  | KF041232  | 10723         | 2011       | Homo sapiens | Pakistan     |

|                         |          |       |         |              |           |
|-------------------------|----------|-------|---------|--------------|-----------|
| D2/Pakistan/2011-3/2011 | KF041233 | 10723 | 2011    | Homo sapiens | Pakistan  |
| D2/Pakistan/2011-4/2011 | KF041234 | 10723 | 2011    | Homo sapiens | Pakistan  |
| D2/Pakistan/209/2009    | KF041235 | 10723 | 2009    | Homo sapiens | Pakistan  |
| D2/Pakistan/51/2008     | KF041236 | 10723 | 2008    | Homo sapiens | Pakistan  |
| D2/Pakistan/78/2009     | KF041237 | 10723 | 2009    | Homo sapiens | Pakistan  |
| D2/Pk/A1/2011           | KM217157 | 10656 | 08/2011 | Homo sapiens | Pakistan  |
| D2/Pk/A2/2011           | KM217156 | 10656 | 08/2011 | Homo sapiens | Pakistan  |
| D2/Pk/Swat-01           | KM217158 | 10656 | 08/2013 | Homo sapiens | Pakistan  |
| D2/SG/05K3295DK1/2005   | EU081177 | 10723 | 2005    | -N/A-        | Singapore |
| D2/SG/05K3330DK1/2005   | EU081178 | 10723 | 2005    | -N/A-        | Singapore |
| D2/SG/05K4137DK1/2005   | EU081179 | 10723 | 2005    | -N/A-        | Singapore |
| D2/SG/05K4155DK1/2005   | EU081180 | 10723 | 2005    | -N/A-        | Singapore |
| D2/SG/CT10/2012         | KX380809 | 10722 | 2012    | Homo sapiens | Singapore |
| D2/SG/CT12/2012         | KX380810 | 10720 | 2012    | Homo sapiens | Singapore |
| D2/SG/CT13/2012         | KX380811 | 10723 | 2012    | Homo sapiens | Singapore |
| D2/SG/CT15/2012         | KX380812 | 10722 | 2012    | Homo sapiens | Singapore |
| D2/SG/CT18/2012         | KX380813 | 10723 | 2012    | Homo sapiens | Singapore |
| D2/SG/CT19/2012         | KX380814 | 10677 | 2012    | Homo sapiens | Singapore |
| D2/SG/CT2/2012          | KX380807 | 10722 | 2012    | Homo sapiens | Singapore |
| D2/SG/CT20/2012         | KX380815 | 10722 | 2012    | Homo sapiens | Singapore |
| D2/SG/CT21/2012         | KX380816 | 10719 | 2012    | Homo sapiens | Singapore |
| D2/SG/CT22/2012         | KX380817 | 10723 | 2012    | Homo sapiens | Singapore |
| D2/SG/CT23/2012         | KX380818 | 10723 | 2012    | Homo sapiens | Singapore |
| D2/SG/CT24/2012         | KX380819 | 10722 | 2012    | Homo sapiens | Singapore |
| D2/SG/CT26/2012         | KX380820 | 10722 | 2012    | Homo sapiens | Singapore |
| D2/SG/CT27/2012         | KX380821 | 10721 | 2012    | Homo sapiens | Singapore |
| D2/SG/CT28/2012         | KX380822 | 10722 | 2012    | Homo sapiens | Singapore |
| D2/SG/CT29/2012         | KX380823 | 10705 | 2012    | Homo sapiens | Singapore |
| D2/SG/CT30/2012         | KX380824 | 10723 | 2012    | Homo sapiens | Singapore |
| D2/SG/CT31/2013         | KX380825 | 10722 | 2013    | Homo sapiens | Singapore |
| D2/SG/CT32/2013         | KX380826 | 10720 | 2013    | Homo sapiens | Singapore |
| D2/SG/CT34/2013         | KX380827 | 10721 | 2013    | Homo sapiens | Singapore |
| D2/SG/CT35/2013         | KX380828 | 10723 | 2013    | Homo sapiens | Singapore |
| D2/SG/CT36/2013         | KX380829 | 10722 | 2013    | Homo sapiens | Singapore |
| D2/SG/CT38/2013         | KX380830 | 10720 | 2013    | Homo sapiens | Singapore |
| D2/SG/CT39/2013         | KX380831 | 10718 | 2013    | Homo sapiens | Singapore |
| D2/SG/CT4/2012          | KX380808 | 10723 | 2012    | Homo sapiens | Singapore |
| D2/SG/CT40/2013         | KX380832 | 10721 | 2013    | Homo sapiens | Singapore |
| D2/SG/CT41/2013         | KX380833 | 10722 | 2013    | Homo sapiens | Singapore |
| D2/SG/CT42/2013         | KX380834 | 10723 | 2013    | Homo sapiens | Singapore |

|                      |          |       |      |              |           |
|----------------------|----------|-------|------|--------------|-----------|
| D2/SG/CT44/2013      | KX380835 | 10696 | 2013 | Homo sapiens | Singapore |
| D2/SG/CT46/2013      | KX380836 | 10719 | 2013 | Homo sapiens | Singapore |
| D2/SG/CT50/2013      | KX380837 | 10720 | 2013 | Homo sapiens | Singapore |
| D2/SG/CT51/2013      | KX380838 | 10713 | 2013 | Homo sapiens | Singapore |
| D2/Taiwan/700TN1509a | KU365903 | 10638 | 2015 | Homo sapiens | Taiwan    |
| D2/Taiwan/704TN1505a | KU365901 | 10638 | 2015 | Homo sapiens | Taiwan    |
| D2/Taiwan/704TN1506b | KU365902 | 10638 | 2015 | Homo sapiens | Taiwan    |
| DC331Y11             | KM279515 | 10723 | 2011 | Homo sapiens | Singapore |
| DC353Y11             | KM279517 | 10723 | 2011 | Homo sapiens | Singapore |
| DC357Y11             | KM279518 | 10723 | 2011 | Homo sapiens | Singapore |
| DC367Y11             | KM279519 | 10723 | 2011 | Homo sapiens | Singapore |
| DC378Y11             | KM279520 | 10723 | 2011 | Homo sapiens | Singapore |
| DC380Y11             | KM279581 | 10723 | 2011 | Homo sapiens | Singapore |
| DC389Y11             | KM279582 | 10723 | 2011 | Homo sapiens | Singapore |
| DC391Y11             | KM279521 | 10723 | 2011 | Homo sapiens | Singapore |
| DC395Y11             | KM279522 | 10723 | 2011 | Homo sapiens | Singapore |
| DC403Y11             | KM279523 | 10723 | 2011 | Homo sapiens | Singapore |
| DC415Y11             | KM279524 | 10723 | 2011 | Homo sapiens | Singapore |
| DC427Y11             | KM279586 | 10723 | 2011 | Homo sapiens | Singapore |
| DC429Y11             | KM279525 | 10723 | 2011 | Homo sapiens | Singapore |
| DC430Y11             | KM279526 | 10723 | 2011 | Homo sapiens | Singapore |
| DC589Y12             | KM279528 | 10723 | 2012 | Homo sapiens | Singapore |
| DC596Y12             | KM279587 | 10723 | 2012 | Homo sapiens | Singapore |
| DC597Y12             | KM279530 | 10723 | 2012 | Homo sapiens | Singapore |
| DC618Y12             | KM279532 | 10723 | 2012 | Homo sapiens | Singapore |
| DC619Y12             | KM279533 | 10723 | 2012 | Homo sapiens | Singapore |
| DC620Y12             | KM279534 | 10723 | 2012 | Homo sapiens | Singapore |
| DC621Y12             | KM279535 | 10723 | 2012 | Homo sapiens | Singapore |
| DC629Y12             | KM279536 | 10723 | 2012 | Homo sapiens | Singapore |
| DC635Y12             | KM279537 | 10723 | 2012 | Homo sapiens | Singapore |
| DC636Y12             | KM279588 | 10723 | 2012 | Homo sapiens | Singapore |
| DC639Y12             | KM279538 | 10723 | 2012 | Homo sapiens | Singapore |
| DC641Y12             | KM279539 | 10723 | 2012 | Homo sapiens | Singapore |
| DC642Y12             | KM279540 | 10723 | 2012 | Homo sapiens | Singapore |
| DC643Y12             | KM279541 | 10723 | 2012 | Homo sapiens | Singapore |
| DC644Y12             | KM279542 | 10723 | 2012 | Homo sapiens | Singapore |
| DC645Y12             | KM279543 | 10723 | 2012 | Homo sapiens | Singapore |
| DC648Y12             | KM279571 | 10723 | 2012 | Homo sapiens | Singapore |
| DC649Y12             | KM279544 | 10723 | 2012 | Homo sapiens | Singapore |
| DC652Y12             | KM279545 | 10723 | 2012 | Homo sapiens | Singapore |

|                          |          |       |      |               |              |
|--------------------------|----------|-------|------|---------------|--------------|
| DC654Y12                 | KM279546 | 10723 | 2012 | Homo sapiens  | Singapore    |
| DC657Y12                 | KM279548 | 10723 | 2012 | Homo sapiens  | Singapore    |
| DC661Y12                 | KM279549 | 10723 | 2012 | Homo sapiens  | Singapore    |
| DC663Y12                 | KM279550 | 10723 | 2012 | Homo sapiens  | Singapore    |
| DC669Y12                 | KM279551 | 10723 | 2012 | Homo sapiens  | Singapore    |
| DC673Y12                 | KM279552 | 10723 | 2012 | Homo sapiens  | Singapore    |
| DC677Y12                 | KM279553 | 10723 | 2012 | Homo sapiens  | Singapore    |
| DC687Y12                 | KM279554 | 10723 | 2012 | Homo sapiens  | Singapore    |
| DC688Y12                 | KM279590 | 10723 | 2012 | Homo sapiens  | Singapore    |
| DC694Y12                 | KM279555 | 10723 | 2012 | Homo sapiens  | Singapore    |
| DC704Y12                 | KM279556 | 10723 | 2012 | Homo sapiens  | Singapore    |
| DC710Y12                 | KM279557 | 10724 | 2012 | Homo sapiens  | Singapore    |
| DC716Y12                 | KM279591 | 10723 | 2012 | Homo sapiens  | Singapore    |
| DC719Y12                 | KM279597 | 10723 | 2012 | Homo sapiens  | Singapore    |
| DC720Y12                 | KM279592 | 10723 | 2012 | Homo sapiens  | Singapore    |
| DC730Y12                 | KM279558 | 10723 | 2012 | Homo sapiens  | Singapore    |
| DC735Y12                 | KM279559 | 10723 | 2012 | Homo sapiens  | Singapore    |
| DC740Y12                 | KM279560 | 10723 | 2012 | Homo sapiens  | Singapore    |
| DC756Y12                 | KM279561 | 10723 | 2012 | Homo sapiens  | Singapore    |
| DC759Y12                 | KM279593 | 10723 | 2012 | Homo sapiens  | Singapore    |
| DC763Y12                 | KM279562 | 10723 | 2012 | Homo sapiens  | Singapore    |
| DC766Y12                 | KM279563 | 10723 | 2012 | Homo sapiens  | Singapore    |
| DC771Y12                 | KM279594 | 10723 | 2012 | Homo sapiens  | Singapore    |
| DC786Y12                 | KM279564 | 10723 | 2012 | Homo sapiens  | Singapore    |
| DC790Y12                 | KM279565 | 10723 | 2012 | Homo sapiens  | Singapore    |
| DC792Y12                 | KM279595 | 10723 | 2012 | Homo sapiens  | Singapore    |
| DC793Y12                 | KM279566 | 10723 | 2012 | Homo sapiens  | Singapore    |
| DC795Y12                 | KM279572 | 10723 | 2012 | Homo sapiens  | Singapore    |
| DC796Y12                 | KM279573 | 10723 | 2012 | Homo sapiens  | Singapore    |
| DC811Y12                 | KM279567 | 10723 | 2012 | Homo sapiens  | Singapore    |
| DC812Y12                 | KM279568 | 10723 | 2012 | Homo sapiens  | Singapore    |
| DC814Y12                 | KM279569 | 10723 | 2012 | Homo sapiens  | Singapore    |
| DC827Y12                 | KM279575 | 10723 | 2012 | Homo sapiens  | Singapore    |
| DC848Y12                 | KM279570 | 10723 | 2012 | Homo sapiens  | Singapore    |
| DENV-2/BF/BID-V3502/1986 | GU131843 | 10657 | 1986 | Aedes aegypti | Burkina Faso |
| DENV-2/GU/BID-V2950/2001 | HM488257 | 10967 | 2001 | Homo sapiens  | Guam         |
| DENV-2/ID/1016DN/1975    | GQ398258 | 10723 | 1975 | Homo sapiens  | Indonesia    |
| DENV-2/ID/1017DN/1976    | GQ398259 | 10723 | 1976 | Homo sapiens  | Indonesia    |
| DENV-2/ID/1023DN/1975    | GQ398263 | 10723 | 1975 | Homo sapiens  | Indonesia    |
| DENV-2/ID/1046DN/1976    | GQ398264 | 10723 | 1976 | Homo sapiens  | Indonesia    |

|                           |          |       |            |              |             |
|---------------------------|----------|-------|------------|--------------|-------------|
| DENV-2/ID/1070DN/1976     | GQ398260 | 10723 | 1976       | Homo sapiens | Indonesia   |
| DENV-2/ID/1127DN/1976     | GQ398262 | 10723 | 1976       | Homo sapiens | Indonesia   |
| DENV-2/ID/1172DN/1976     | GQ398261 | 10723 | 1976       | Homo sapiens | Indonesia   |
| DENV-2/IN/BID-V2961/2006  | FJ898454 | 10669 | 2006       | Homo sapiens | India       |
| DENV-2/IND/053598/2005    | JQ922551 | 10639 | 2005       | Homo sapiens | India       |
| DENV-2/IND/969201/1996    | JQ922549 | 10648 | 1996       | Homo sapiens | India       |
| DENV-2/LK/BID-V2416/1996  | FJ882602 | 10677 | 1996       | Homo sapiens | Sri Lanka   |
| DENV-2/LK/BID-V2421/2003  | GQ252676 | 10629 | 2003       | Homo sapiens | Sri Lanka   |
| DENV-2/LK/BID-V2422/2004  | GQ252677 | 10628 | 2004       | Homo sapiens | Sri Lanka   |
| DENV-2/PK                 | KF360005 | 10629 | 11/01/2010 | Homo sapiens | Pakistan    |
| DENV-2/PK/2011            | KJ010185 | 10629 | 10/20/2011 | Homo sapiens | Pakistan    |
| DENV-2/PK/2013            | KJ010186 | 10629 | 10/02/2013 | Homo sapiens | Pakistan    |
| DENV-2/Pk/Swat-02         | KJ701507 | 10656 | 08/27/2013 | Homo sapiens | Pakistan    |
| DENV-2/SG/07K3588DK1/2007 | GQ398267 | 10723 | 2007       | Homo sapiens | Singapore   |
| DENV-2/SG/07K3598DK2/2007 | GQ398266 | 10723 | 2007       | Homo sapiens | Singapore   |
| DENV-2/SG/07K3608DK1/2008 | GQ398265 | 10723 | 2008       | Homo sapiens | Singapore   |
| DENV-2/SG/D2Y98P-PP1/2009 | JF327392 | 10723 | 2009       | -N/A-        | Singapore   |
| DENV-2/VN/BID-V703/2006   | EU482640 | 10676 | 2006       | Homo sapiens | Viet Nam    |
| DENV-2/VN/BID-V735/2006   | EU482672 | 10678 | 2006       | Homo sapiens | Viet Nam    |
| DENV2-1365                | KU509272 | 10262 | 2009       | Homo sapiens | Thailand    |
| DENV2-14706               | KU509277 | 10551 | 2010       | Homo sapiens | Philippines |
| DENV2-2627                | KU509271 | 10546 | 2006       | Homo sapiens | India       |
| DENV2-3519                | KU509274 | 10540 | 2010       | Homo sapiens | Philippines |
| DENV2-3849                | KU509275 | 10455 | 2008       | Homo sapiens | Philippines |
| DENV2-3850                | KU509276 | 10395 | 2008       | Homo sapiens | Philippines |
| DENV2-671                 | KU509268 | 10523 | 2009       | Homo sapiens | Indonesia   |
| DENV2-973                 | KU509269 | 10557 | 2009       | Homo sapiens | Philippines |
| DENV2-979                 | KU509270 | 10536 | 2012       | Homo sapiens | -N/A-       |
| DENV2/CN/GZ05/2014        | KP012546 | 10723 | 2014       | Homo sapiens | China       |
| DENV2/CN/GZ1118/2014      | KT187558 | 10723 | 2014       | Homo sapiens | China       |
| DENV2/CN/GZ25/2014        | KP723478 | 10583 | 2014       | Homo sapiens | China       |
| DENV2/CN/GZ32/2010        | KP723479 | 10723 | 2010       | Homo sapiens | China       |
| DENV2/CN/GZDF31241/2014   | KT187553 | 10723 | 2014       | Homo sapiens | China       |
| DENV2/CN/GZDF571/2014     | KT187554 | 10723 | 2014       | Homo sapiens | China       |
| DENV2/CN/GZDF574/2014     | KT187555 | 10723 | 2014       | Homo sapiens | China       |
| DENV2/CN/GZDF595/2014     | KT187556 | 10723 | 2014       | Homo sapiens | China       |
| DENV2/CN/GZDF615/2014     | KT187557 | 10723 | 2014       | Homo sapiens | China       |
| DS04-221205               | EU179858 | 10709 | 2005       | -N/A-        | Brunei      |
| DS09-280106               | EU179859 | 10709 | 2006       | -N/A-        | Brunei      |
| DS31-291005               | EU179857 | 10709 | 2005       | -N/A-        | Brunei      |

|                           |          |       |            |              |              |
|---------------------------|----------|-------|------------|--------------|--------------|
| E1379Y12                  | KM279598 | 10723 | 2012       | Homo sapiens | Singapore    |
| E1429Y12                  | KM279599 | 10723 | 2012       | Homo sapiens | Singapore    |
| E1432Y12                  | KM279600 | 10723 | 2012       | Homo sapiens | Singapore    |
| E1433Y12                  | KM279576 | 10723 | 2012       | Homo sapiens | Singapore    |
| E1434Y12                  | KM279577 | 10723 | 2012       | Homo sapiens | Singapore    |
| E1436Y12                  | KM279578 | 10723 | 2012       | Homo sapiens | Singapore    |
| E1439Y12                  | KM279601 | 10723 | 2012       | Homo sapiens | Singapore    |
| E1502Y12                  | KM279579 | 10723 | 2012       | Homo sapiens | Singapore    |
| FJ-10                     | AF276619 | 10723 | -N/A-      | -N/A-        | China        |
| FJ11/99                   | AF359579 | 10723 | 1999       | -N/A-        | -N/A-        |
| GD01/01                   | FJ196852 | 10723 | 2001       | -N/A-        | China        |
| GD01/03                   | FJ196853 | 10723 | 2003       | -N/A-        | China        |
| GD06/93                   | FJ196854 | 10723 | 1993       | -N/A-        | China        |
| GD09/93                   | KC964094 | 10723 | 1993       | Homo sapiens | China        |
| GWL18 INDI-01             | DQ448231 | 10670 | 2001       | Homo sapiens | India        |
| GZ40                      | JX470186 | 10723 | 2010       | Homo sapiens | China        |
| GZ8_12/S/Panyu/2014/DEV2  | KX655786 | 10653 | 2015       | Homo sapiens | China        |
| GZ8_13/S/Yuexiu/2014/DEV2 | KX225485 | 10668 | 2015       | Homo sapiens | China        |
| GZ8_15/S/GZ/2014/DEV2     | KX655787 | 10635 | 2015       | Homo sapiens | China        |
| GZ8_19/S/Haizhu/2014/DEV2 | KX225486 | 10631 | 2015       | Homo sapiens | China        |
| GZ8_70/M/Baiyun/2013/DEV2 | KX655788 | 10668 | 2015       | Homo sapiens | China        |
| ID-CN18-14                | KU517846 | 10723 | 05/07/2014 | Homo sapiens | Indonesia    |
| Jeddah-2014               | KJ830750 | 10718 | 01/13/2014 | Homo sapiens | Saudi Arabia |
| MKS-0068                  | KC762665 | 10723 | 07/06/2007 | Homo sapiens | Indonesia    |
| MKS-0071                  | KC762669 | 10723 | 07/17/2007 | Homo sapiens | Indonesia    |
| MKS-0082                  | KC762658 | 10723 | 08/14/2007 | Homo sapiens | Indonesia    |
| MKS-0084                  | KC762660 | 10723 | 11/21/2007 | Homo sapiens | Indonesia    |
| MKS-0091                  | KC762670 | 10723 | 12/11/2007 | Homo sapiens | Indonesia    |
| MKS-0099                  | KC762676 | 10723 | 07/17/2007 | Homo sapiens | Indonesia    |
| MKS-0297                  | KC762662 | 10723 | 11/21/2007 | Homo sapiens | Indonesia    |
| MKS-0412                  | KC762661 | 10723 | 09/24/2007 | Homo sapiens | Indonesia    |
| MKS-0417                  | KC762655 | 10723 | 09/27/2007 | Homo sapiens | Indonesia    |
| MKS-0502                  | KC762656 | 10723 | 12/11/2007 | Homo sapiens | Indonesia    |
| MKS-2018                  | KC762673 | 10723 | 03/11/2008 | Homo sapiens | Indonesia    |
| MKS-2024                  | KC762663 | 10723 | 02/20/2008 | Homo sapiens | Indonesia    |
| MKS-2032                  | KC762675 | 10723 | 03/08/2008 | Homo sapiens | Indonesia    |
| MKS-2108                  | KC762671 | 10723 | 02/19/2008 | Homo sapiens | Indonesia    |
| MKS-2145                  | KC762664 | 10723 | 03/28/2008 | Homo sapiens | Indonesia    |
| MKS-2167                  | KC762674 | 10723 | 03/11/2008 | Homo sapiens | Indonesia    |
| MKS-2198                  | KC762672 | 10723 | 04/09/2008 | Homo sapiens | Indonesia    |

|                    |          |       |            |              |                  |
|--------------------|----------|-------|------------|--------------|------------------|
| MKS-2204           | KC762667 | 10723 | 04/12/2008 | Homo sapiens | Indonesia        |
| MKS-2210           | KC762659 | 10723 | 04/15/2008 | Homo sapiens | Indonesia        |
| MKS-2234           | KC762657 | 10723 | 04/23/2008 | Homo sapiens | Indonesia        |
| MKS-3007           | KC762666 | 10723 | 02/15/2008 | Homo sapiens | Indonesia        |
| MKS-IF011          | KC762677 | 10723 | 02/15/2008 | Homo sapiens | Indonesia        |
| MKS-IF014          | KC762668 | 10723 | 03/11/2008 | Homo sapiens | Indonesia        |
| MKS-WS73           | KC762678 | 10723 | 03/04/2010 | Homo sapiens | Indonesia        |
| MKS-WS79a          | KC762679 | 10723 | 03/29/2010 | Homo sapiens | Indonesia        |
| MKS-WS80           | KC762680 | 10723 | 04/05/2010 | Homo sapiens | Indonesia        |
| Od2112             | JQ955624 | 10670 | 2011       | Homo sapiens | India            |
| PG-CN10-13         | KU517845 | 10723 | 04/23/2013 | Homo sapiens | Papua New Guinea |
| PH-CN77-15         | KU517847 | 10723 | 08/03/2015 | Homo sapiens | Philippines      |
| QHD13CAIQ          | KF479233 | 10723 | 01/04/2013 | Homo sapiens | China            |
| QML16              | KX372564 | 10723 | 2015       | Homo sapiens | Australia        |
| RGCB880/2010       | KY427084 | 10723 | 09/01/2010 | Homo sapiens | India            |
| RGCB921/2011       | KY427085 | 10723 | 01/03/2011 | Homo sapiens | India            |
| RR44               | JQ955623 | 10670 | 2009       | Homo sapiens | India            |
| D2/SG/EHI/03157Y13 | KR779786 | 10723 | 2013       | Homo sapiens | Singapore        |
| D2/SG/EHI/0466Y07  | KR779782 | 10723 | 2007       | Homo sapiens | Singapore        |
| D2/SG/EHI/09087Y15 | KY921905 | 10723 | 03/2015    | Homo sapiens | Singapore        |
| D2/SG/EHI/09423Y14 | KY921904 | 10723 | 03/2014    | Homo sapiens | Singapore        |
| D2/SG/EHI/0017Y06  | JN851113 | 10176 | 2006       | Homo sapiens | Singapore        |
| D2/SG/EHI/0099Y07  | GU370050 | 10200 | 04/2007    | Homo sapiens | Singapore        |
| D2/SG/EHI/0194Y08  | JN851119 | 10176 | 2008       | Homo sapiens | Singapore        |
| D2/SG/EHI/0204Y06  | JN851129 | 10176 | 2006       | Homo sapiens | Singapore        |
| D2/SG/EHI/0232Y06  | JN851128 | 10176 | 2006       | Homo sapiens | Singapore        |
| D2/SG/EHI/0270Y05  | JN851130 | 10176 | 2005       | Homo sapiens | Singapore        |
| D2/SG/EHI/0345Y05  | JN851125 | 10176 | 2005       | Homo sapiens | Singapore        |
| D2/SG/EHI/0377Y04  | JN851123 | 10176 | 2004       | Homo sapiens | Singapore        |
| D2/SG/EHI/0391Y08  | JN851118 | 10176 | 2008       | Homo sapiens | Singapore        |
| D2/SG/EHI/0431Y07  | JN851117 | 10176 | 2007       | Homo sapiens | Singapore        |
| D2/SG/EHI/0462Y05  | JN851124 | 10176 | 2005       | Homo sapiens | Singapore        |
| D2/SG/EHI/0522Y07  | JN851114 | 10176 | 2007       | Homo sapiens | Singapore        |
| D2/SG/EHI/0578Y05  | JN851126 | 10176 | 2005       | Homo sapiens | Singapore        |
| D2/SG/EHI/0615Y08  | JN851121 | 10176 | 2008       | Homo sapiens | Singapore        |
| D2/SG/EHI/0642Y07  | JN851115 | 10176 | 2007       | Homo sapiens | Singapore        |
| D2/SG/EHI/0685Y04  | JN851127 | 10176 | 2004       | Homo sapiens | Singapore        |
| D2/SG/EHI/0722Y07  | JN851120 | 10176 | 2007       | Homo sapiens | Singapore        |
| D2/SG/EHI/0762Y05  | JN851131 | 10176 | 2005       | Homo sapiens | Singapore        |
| D2/SG/EHI/0950Y08  | JN851122 | 10176 | 2008       | Homo sapiens | Singapore        |



|                   |          |       |         |              |           |
|-------------------|----------|-------|---------|--------------|-----------|
| D2/SG/EHI/1079Y07 | JN851116 | 10176 | 2007    | Homo sapiens | Singapore |
| D2/SG/EHI/1158Y08 | GU370051 | 10527 | 08/2008 | Homo sapiens | Singapore |
| Taiwan-1008DHF    | AY776328 | 10485 | -N/A-   | -N/A-        | Taiwan    |
| TB16i             | AY858036 | 10723 | -N/A-   | Homo sapiens | Indonesia |
| TM101             | KX452021 | 10539 | 01/2014 | Homo sapiens | Malaysia  |
| TM103             | KX452022 | 10667 | 01/2014 | Homo sapiens | Malaysia  |
| TM107             | KX452024 | 10816 | 01/2014 | Homo sapiens | Malaysia  |
| TM109             | KX452025 | 10785 | 01/2014 | Homo sapiens | Malaysia  |
| TM113             | KX452026 | 10674 | 01/2014 | Homo sapiens | Malaysia  |
| TM120             | KX452027 | 10720 | 01/2014 | Homo sapiens | Malaysia  |
| TM121             | KX452028 | 10708 | 01/2014 | Homo sapiens | Malaysia  |
| TM123             | KX452029 | 10627 | 01/2014 | Homo sapiens | Malaysia  |
| TM132             | KX452030 | 10826 | 01/2014 | Homo sapiens | Malaysia  |
| TM135             | KX452031 | 10746 | 01/2014 | Homo sapiens | Malaysia  |
| TM136             | KX452032 | 10780 | 01/2014 | Homo sapiens | Malaysia  |
| TM151             | KX452033 | 10627 | 01/2014 | Homo sapiens | Malaysia  |
| TM16              | KX452015 | 10796 | 01/2014 | Homo sapiens | Malaysia  |
| TM175             | KX452034 | 10615 | 01/2014 | Homo sapiens | Malaysia  |
| TM199             | KX452035 | 10686 | 01/2014 | Homo sapiens | Malaysia  |
| TM203             | KX452036 | 10532 | 01/2014 | Homo sapiens | Malaysia  |
| TM209             | KX452037 | 10615 | 01/2014 | Homo sapiens | Malaysia  |
| TM210             | KX452038 | 10497 | 01/2014 | Homo sapiens | Malaysia  |
| TM220             | KX452039 | 10554 | 01/2014 | Homo sapiens | Malaysia  |
| TM223             | KX452040 | 10665 | 01/2014 | Homo sapiens | Malaysia  |
| TM243             | KX452041 | 10676 | 01/2014 | Homo sapiens | Malaysia  |
| TM244             | KX452042 | 10757 | 01/2014 | Homo sapiens | Malaysia  |
| TM246             | KX452043 | 10741 | 01/2014 | Homo sapiens | Malaysia  |
| TM266             | KX452044 | 10635 | 01/2014 | Homo sapiens | Malaysia  |
| TM280             | KX452045 | 10661 | 01/2014 | Homo sapiens | Malaysia  |
| TM289             | KX452046 | 10600 | 01/2014 | Homo sapiens | Malaysia  |
| TM35              | KX452016 | 10575 | 01/2014 | Homo sapiens | Malaysia  |
| TM38              | KX452017 | 10940 | 01/2014 | Homo sapiens | Malaysia  |
| TM39              | KX452018 | 10807 | 01/2014 | Homo sapiens | Malaysia  |
| TM61              | KX452019 | 10692 | 01/2014 | Homo sapiens | Malaysia  |
| TM74              | KX452020 | 10660 | 01/2014 | Homo sapiens | Malaysia  |
| TSV01             | AY037116 | 10723 | -N/A-   | -N/A-        | Australia |
| XHZF10615         | KY937188 | 10741 | 2015    | Homo sapiens | China     |
| XLLM10666         | KY937186 | 10742 | 2015    | Homo sapiens | China     |
| XLXY10594         | KY937190 | 10741 | 2015    | Homo sapiens | China     |
| XSMY10589         | KY937187 | 10742 | 2015    | Homo sapiens | China     |

|           |          |       |         |              |       |
|-----------|----------|-------|---------|--------------|-------|
| XZW10694  | KY937189 | 10734 | 2015    | Homo sapiens | China |
| XZXM10610 | KY937185 | 10742 | 2015    | Homo sapiens | China |
| ZH1340    | EU359009 | 10723 | -N/A-   | Homo sapiens | China |
| ZH413-2   | KC131142 | 10673 | 09/2012 | Homo sapiens | China |
| ZS01/01   | EF051521 | 10723 | 2001    | -N/A-        | China |

---
